# Supplementary material for: Comparison of Different Machine Learning Algorithms for the Prediction of the Wheat Grain Filling Stage Using RGB Images
Source: MDPI journal article supplement (doi:10.3390/plants12234043), 2023-11-30
Supplement: s1 [file s1]

**Table S1.** Details of datasets.

| DAA (days after anthesis) | Number of samples | Samples                                                                               |                                                                                       |
|---------------------------|-------------------|---------------------------------------------------------------------------------------|---------------------------------------------------------------------------------------|
| 6                         | 516               |    |    |
| 9                         | 539               |    |    |
| 12                        | 538               |    |    |
| 15                        | 539               |    |    |
| 18                        | 499               |    |    |
| 21                        | 499               |    |    |
| 24                        | 539               |   |   |
| 27                        | 521               |  |  |
| 30                        | 519               |  |  |
| 33                        | 532               |  |  |
| 36                        | 539               |  |  |
| 39                        | 479               |  |  |

**Table S2.** Model size.

| Algorithm                    |                        | Model size (MB) |
|------------------------------|------------------------|-----------------|
| Traditional machine learning | Decision Tree          | 0.01            |
|                              | Support Vector Machine | 1.01            |
|                              | Random Forest          | 0.15            |
| Deep learning                | HRnet18                | 74.37           |
|                              | Densenet121            | 27.15           |
|                              | Inception v3           | 83.51           |
|                              | VGG16                  | 512.36          |
|                              | Resnet18               | 42.73           |
|                              | Resnet50               | 90.07           |
|                              | Resnet101              | 162.82          |
| Few-shot learning            | VIT                    | 146.01          |
|                              | /                      | 72.19           |
